# Supplementary material for: A Chromo-Fluorogenic Naphthoquinolinedione-Based Probe for Dual Detection of Cu2+ and Its Use for Various Water Samples
Source: Molecules. 2022 Jan 25;27(3):785. doi: 10.3390/molecules27030785 (PMC8838320; doi:10.3390/molecules27030785)
Supplement: Supplementary file 1 [file molecules-27-00785-s001.zip › molecules-1552313-supplementary.pdf]

# ESI

## A chromo-fluorogenic naphthoquinolinedione-based probe for dual detection of $\text{Cu}^{2+}$ and its use for various water samples

Ashwani Kumar,<sup>1,\*</sup> Subodh Kumar<sup>b</sup>, Pil Seok Chae,<sup>a,\*</sup>

<sup>1</sup> Department of Bionano Engineering, Hanyang University, Ansan, 155-88, Republic of Korea,

<sup>2</sup> Department of Chemistry, UGC Center for Advanced Studies, Guru Nanak Dev University, Amritsar-143005, Punjab, India

\* Correspondence: ashwanirubal@gmail.com, pchae@hanyang.ac.kr

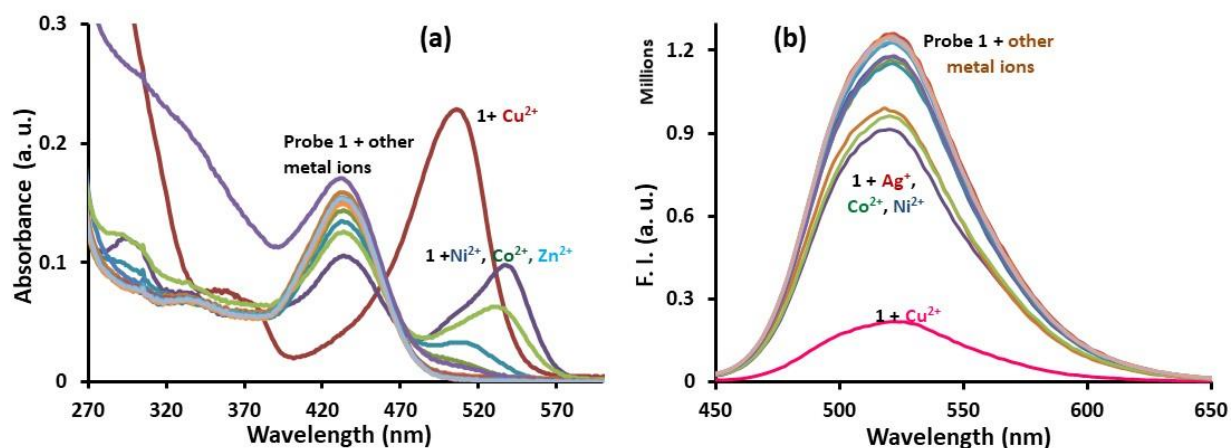

**Figure S1.** Effects of different metal ions on (a) UV-Vis and (b) fluorescence spectrum of probe **1** (10  $\mu\text{M}$ , EtOH). Tested ions include monovalent ( $\text{Na}^+$  and  $\text{K}^+$ ), divalent ( $\text{Mg}^{2+}$ ,  $\text{Ca}^{2+}$ ,  $\text{Ba}^{2+}$ ,  $\text{Fe}^{2+}$ ,  $\text{Co}^{2+}$ ,  $\text{Zn}^{2+}$ ,  $\text{Ag}^+$ ,  $\text{Cd}^{2+}$ ,  $\text{Pb}^{2+}$ ,  $\text{Cu}^{2+}$ ,  $\text{Ni}^{2+}$ , and  $\text{Hg}^{2+}$ ), and trivalent metal ion ( $\text{Cr}^{3+}$ ,  $\text{Fe}^{3+}$ ,  $\text{Ga}^{3+}$ ,  $\text{Al}^{3+}$ , and  $\text{Ru}^{3+}$ ).

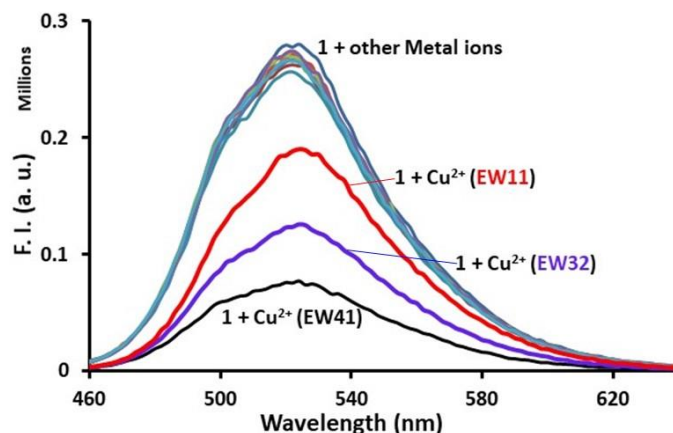

**Figure S2.** Effect of solvent composition on fluorescence spectrum of probe **1** (10  $\mu$ M, EtOH) in the presence of  $\text{Cu}^{2+}$ ;  $\lambda_{\text{ex}} = 435$  nm. Solvent composition varied from 20% (EW41) to 40% (EW32) to 50% (EW11). 'E' and 'W' stand for ethanol and water, respectively. The numbers indicate the ratios of ethanol and water.

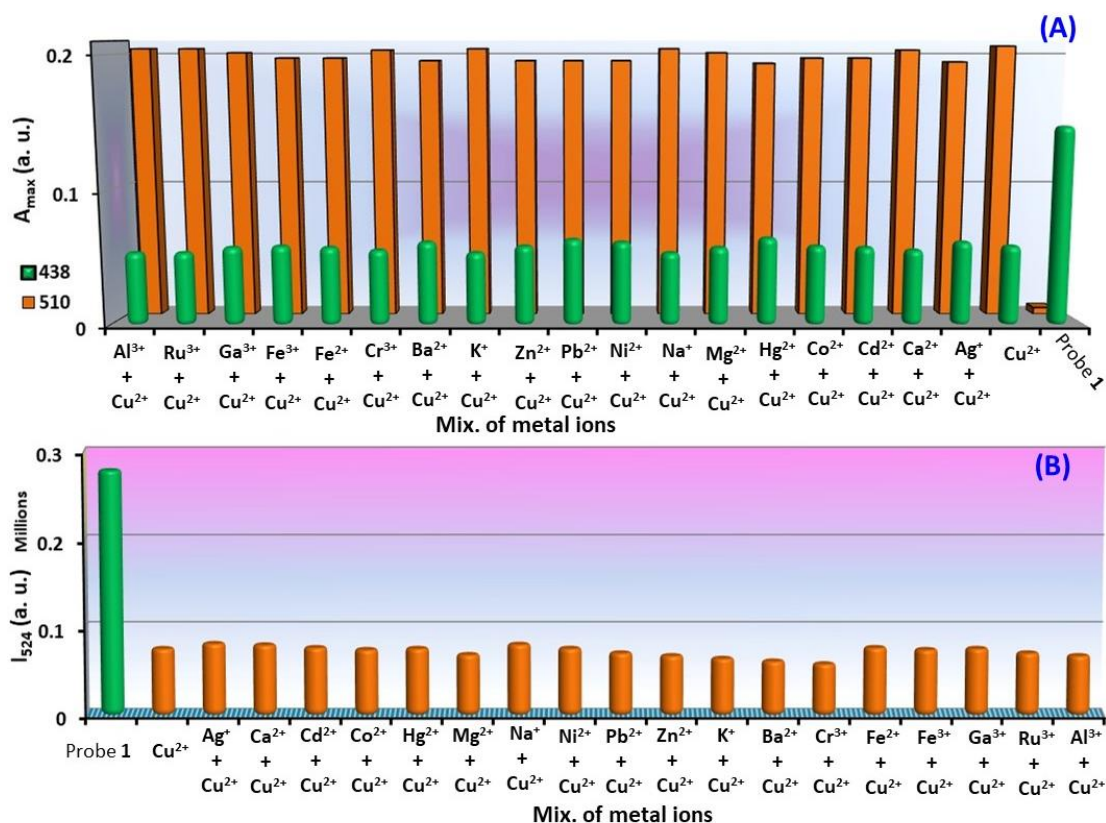

**Figure S3.** Interference study of various metal ions (200  $\mu$ M each) on  $\text{Cu}^{2+}$  sensing of probe **1** (10  $\mu$ M, HEPES (pH 7.4)-EtOH (1:4)). (A) Bar diagram of the absorbance at 438 nm (green) and 510 nm (orange), and (B) fluorescence intensity of probe **1** at 524 nm ( $I_{524}$ ) in the presence of  $\text{Cu}^{2+}$  upon additions of individual metal ions.

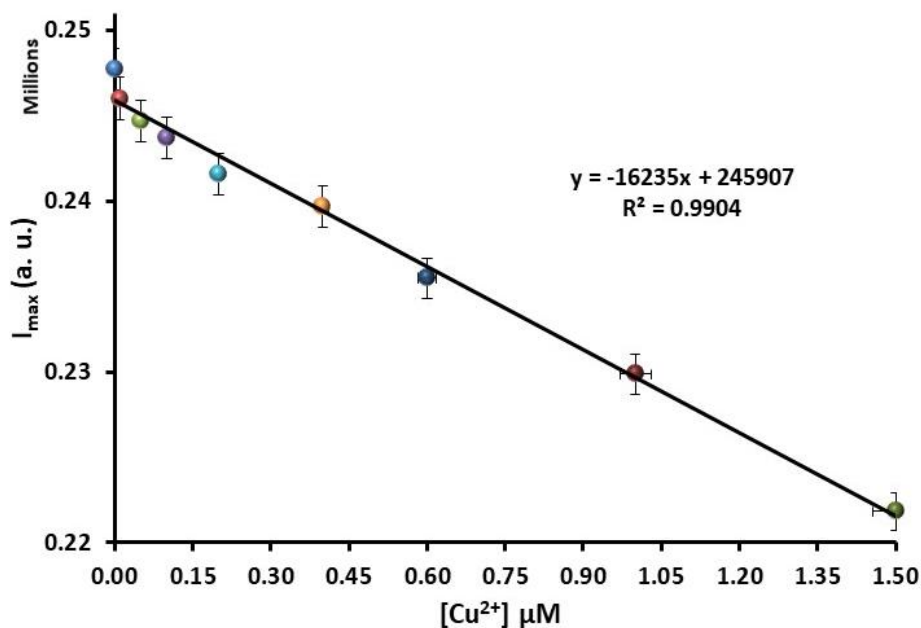

**Figure S4.** Linear plot between the fluorescence intensity of probe **1** (10 μM, HEPES (pH 7.4): EtOH =1:4) and [Cu<sup>2+</sup>]. The probe was excited at 435 nm ( $\lambda_{ex}$ ) and the resulting fluorescence intensity was measured at 524 nm ( $I_{524}$ ).

#### LOD calculation of probe **1** for Cu<sup>2+</sup> detection

A probe LOD was calculated from the fluorescence titration data. The slope ( $K$ ) was obtained from the linear plot of the maximum fluorescence intensity of the probe ( $I_{524}$ ) and [Cu<sup>2+</sup>]. The fluorescence emission spectra of the probe were measured three times, and the standard deviation ( $\sigma$ ) of the blank measurement was obtained.

$$\text{LOD} = 3 \times \sigma / K$$

$$\sigma = \text{Standard deviation of blank measurement} = 0.22435$$

$$K = \text{Slope of the linear plot between the maximum fluorescence intensity of the probe } (I_{524}) \text{ vs } [\text{Cu}^{2+}] = -16235 \times 10^6$$

$$\text{Detection Limit (LOD)} = 3 \times 0.22435 / 16235 \times 10^6 = 4.145 \times 10^{-11} \text{ M} = 41.5 \text{ pM}$$

**Table S1.** LOD comparison of probe **1** with other probes previous reported for Cu<sup>2+</sup> detection.

| S. No. | Probe structure                                                                     | Detection limit<br>in solution<br>(LOD <sub>(Flu.)</sub> ) | Solution,<br>selectivity                                                                                                                                   | Reference                          |
|--------|-------------------------------------------------------------------------------------|------------------------------------------------------------|------------------------------------------------------------------------------------------------------------------------------------------------------------|------------------------------------|
| 1.     | 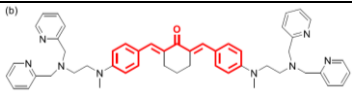   | 0.379 μM                                                   | MeOH/HEPES,<br>pH 7 (1:1)<br><br>Cu <sup>2+</sup> selective<br><br>Respond to Ni <sup>2+</sup> ,<br>Co <sup>2+</sup> , Zn <sup>2+</sup> , Cd <sup>2+</sup> | Dyes Pigments<br>197 (2022) 109845 |
| 2.     | 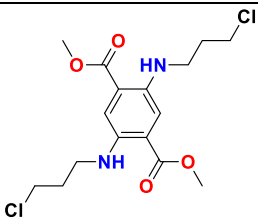   | 0.303 μM                                                   | acetonitrile-<br>water (v/v = 9:1)<br><br>Cu <sup>2+</sup> and<br><br>TFA & TEA                                                                            | Dyes Pigments<br>197 (2022) 109903 |
| 3.     | carbon dots (h-CDs)                                                                 | 1.8 × 10 <sup>-4</sup><br>mmol                             | water                                                                                                                                                      | Dyes Pigments<br>198 (2022) 110008 |
| 4.     | 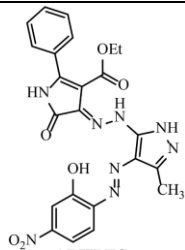 | 0.59–0.98 μM                                               | EtOH:Tris HCl<br>buffer (9:1)<br><br>Cu <sup>2+</sup> , Zn <sup>2+</sup> , Co <sup>2+</sup> ,<br>only colorimetric                                         | Dyes Pigments<br>196 (2021) 109795 |
| 5.     | 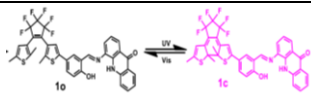 | 0.395 μM                                                   | DMSO<br><br>Arginine, Cu <sup>2+</sup><br><br>only colorimetric                                                                                            | Dyes Pigments<br>195 (2021) 109752 |
| 6.     | 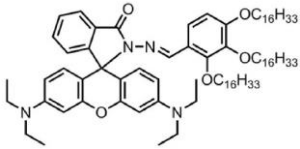 | 0.829 nM.                                                  | Cyclohexanol                                                                                                                                               | Dyes Pigments<br>192 (2021) 109436 |

|     |                                                                                             |                        |                                                                                                                                                            |                                                      |
|-----|---------------------------------------------------------------------------------------------|------------------------|------------------------------------------------------------------------------------------------------------------------------------------------------------|------------------------------------------------------|
| 7.  | 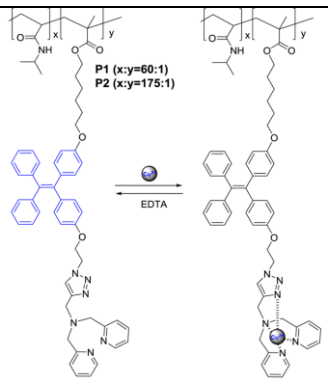           | 57 nM                  | MOPS buffer solution                                                                                                                                       | Sensors and Actuators: B. Chemical 344 (2021) 130241 |
| 8.  | 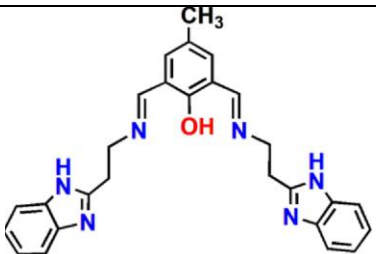           | 24.4 nM                | CH <sub>3</sub> CN:HEPES (1:1)<br>Cu <sup>2+</sup> , Zn <sup>2+</sup> , CN <sup>-</sup> ,<br>P <sub>2</sub> O <sub>7</sub> <sup>4-</sup> , DNA,<br>sensing | Sensors & Actuators: B. Chemical 337 (2021) 129785   |
| 9.  | 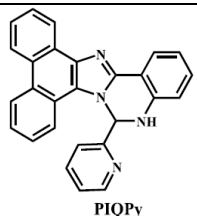<br>PIOPv | 0.1 μM                 | water/EtOH (1:1,<br>HEPES) pH 7.4                                                                                                                          | Dyes Pigments 173 (2020) 107916                      |
| 10. | 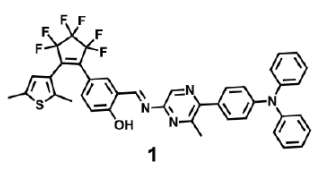<br>1    | $2.0 \times 10^{-6}$ M | THF                                                                                                                                                        | Dye Pigments 173 (2020) 107914.                      |
| 11. | 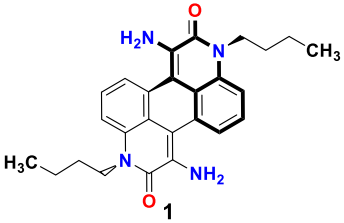<br>1    | 5 nM                   | (HEPES:CH <sub>3</sub> CN (1:1), pH 7.4)                                                                                                                   | Dyes and Pigments 181 (2020) 108522                  |

|     |                                                                                                           |                                 |                                                 |                                                           |
|-----|-----------------------------------------------------------------------------------------------------------|---------------------------------|-------------------------------------------------|-----------------------------------------------------------|
| 12. | 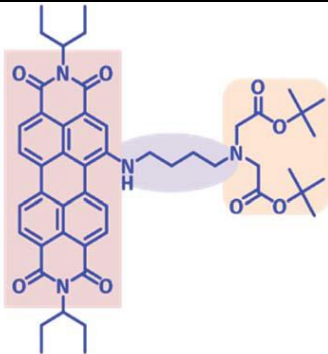                         | 4.8 $\mu\text{M}$               | HEPES: $\text{CH}_3\text{CN}$<br>(4: 6, pH 7.2) | <b>Anal. Methods,</b><br>2020, <b>12</b> , 758-767        |
| 13. | 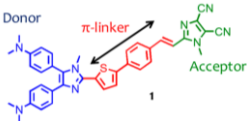                         | $0.53 \times 10^{-6} \text{ M}$ | acetonitrile–water<br>(1:1)                     | J. Org. Chem. 84<br>(2019) 1787-1796                      |
| 14. | 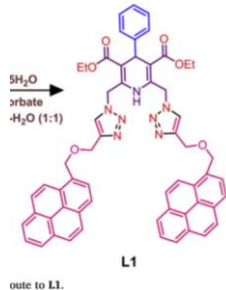                        | $0.53 \times 10^{-6} \text{ M}$ | $\text{CH}_3\text{CN}$                          | Dyes and<br>Pigments 161<br>(2019) 162–171                |
| 15. | <b>ZnS</b> microhybrid particles<br>constructed from interfacial<br>coordination bridge of<br>thiocyanate | $1 \times 10^{-6} \text{ M}$    | THT                                             | Dyes and<br>Pigments 172<br>(2020) 107831                 |
| 16. | Sponge cellulose<br>fluorescence spherical<br>(CS–CDs)                                                    | 0.11 $\mu\text{M}$              | water                                           | ACS Sustainable<br>Chem. Eng. 7<br>(2019) 19157–<br>19166 |
| 17. | 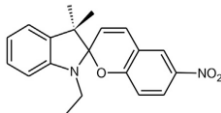                       | $10^{-12} \text{ M}$            | DMF/ $\text{H}_2\text{O}$<br>(9/1, v/v)         | Anal. Chim. Acta<br>1061 (2019) 161-<br>168               |
| 18. | 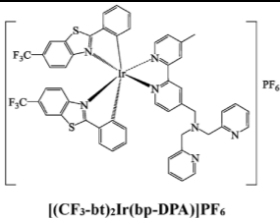                       | $0.5 \times 10^{-6} \text{ M}$  | $\text{CH}_3\text{OH}$                          | Dyes Pigments<br>161 (2019) 252–<br>260                   |

|     |                                                                                                                        |                         |                                                           |                                                      |
|-----|------------------------------------------------------------------------------------------------------------------------|-------------------------|-----------------------------------------------------------|------------------------------------------------------|
| 19. | 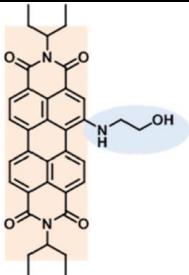                                      | 3 nM                    | HEPES: CH <sub>3</sub> CN<br>(1:1) pH 7.2                 | <i>J. Mater. Chem. B</i> ,<br>7 (2019) 7218–<br>7227 |
| 20. | 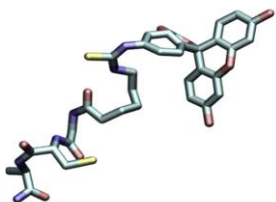<br>L (FITC-Ahx-GCA-NH <sub>2</sub> ) | 37 nM                   | HEPES pH 7.4                                              | <i>Sens. Actuators B</i><br>280 (2019) 129–<br>137   |
| 21. | 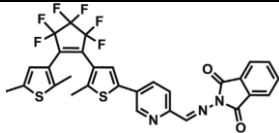                                      | 4.12×10 <sup>-8</sup> M | methanol                                                  | <i>Dyes Pigments</i><br>161 (2019) 34–43             |
| 22. | 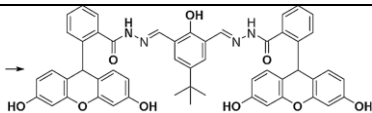                                     | 0.21 μM                 | ACN-H <sub>2</sub> O (3:7)<br>pH 7.0 (HEPES)              | <i>Sens. Actuators B</i><br>282 (2019) 730–<br>742   |
| 23. | 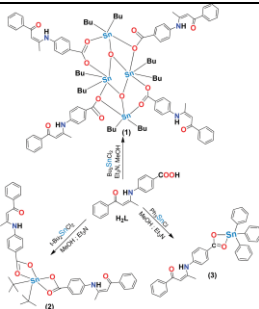                                    | 1.47 μM                 | methanol                                                  | <i>New J. Chem.</i> 43<br>(2019) 16050--<br>16057    |
| 24. | 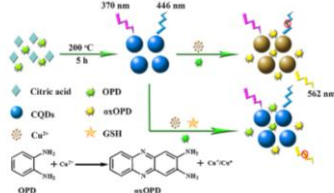                                    | 0.25 μM                 | Tris-HCl buffer<br>(pH 7.4, 50 mmol<br>L <sup>-1</sup> ). | <i>Sens. Actuators B</i><br>298 (2019) 126842        |

|     |                                                                                                       |                                   |                                                         |                                                           |
|-----|-------------------------------------------------------------------------------------------------------|-----------------------------------|---------------------------------------------------------|-----------------------------------------------------------|
| 25. | 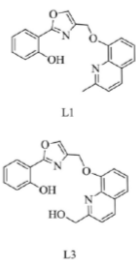 <p>L1</p> <p>L3</p> | $8.24 \times 10^{-8} \text{ M}$   | DMF-H <sub>2</sub> O (1:1)<br>Tris-HCl buffer<br>pH 7.3 | Dyes Pigments<br>161 (2019) 331-340.                      |
| 26. | 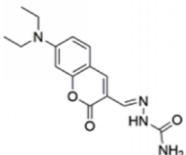                     | $2 \times 10^{-8} \text{ M}$      | EtOH-H <sub>2</sub> O (1:1)                             | Sens. Actuators B<br>288 (2019) 27–37                     |
| 27. | 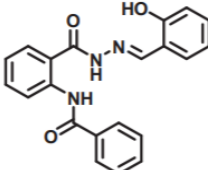                     | $2.26 \times 10^{-6} \text{ M}$   | CH <sub>3</sub> OH-H <sub>2</sub> O (1:1)               | Sensors & Actuators: B.<br>Chemical 275<br>(2018) 350–358 |
| 28. | 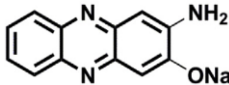                    | $2.2 \times 10^{-7} \text{ M}$    | water                                                   | Dyes Pigments<br>171 (2019) 107707                        |
| 29. | 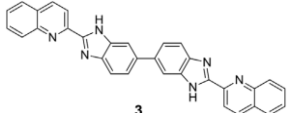 <p>3</p>          | 1.12 nM (calc.)<br>0.05 μM (obs.) | DMSO/H <sub>2</sub> O, (9/1)                            | Dyes Pigments<br>170 (2019) 107651                        |
| 30. | 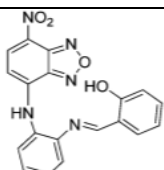                   | $1.8 \times 10^{-7} \text{ M}$    | (CH <sub>3</sub> OH: H <sub>2</sub> O)<br>1:1, HEPES    | New J. Chem. 40<br>(2016) 2418–2422                       |
| 31. | 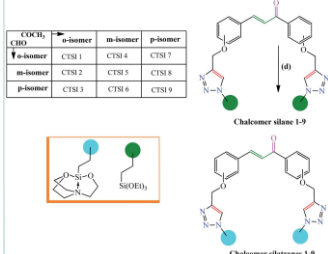                   | $10 \times 10^{-6} \text{ M}$     | MeOH: H <sub>2</sub> O<br>(8: 2)                        | RSC Adv. 5 (2015)<br>12644–12654                          |
| 32. | 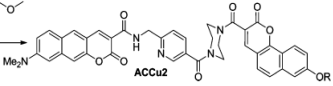 <p>ACCu2</p>      | $0.84 \times 10^{-6} \text{ M}$   | EtOH/HEPES<br>(9/1, v/v, pH 7.0)                        | Anal. Chem. 86<br>(2014)<br>5353–5359                     |

|     |                                                                                        |                                                                                                                                                                    |                                 |                                           |
|-----|----------------------------------------------------------------------------------------|--------------------------------------------------------------------------------------------------------------------------------------------------------------------|---------------------------------|-------------------------------------------|
| 33. | <p><b>pytz capped AgNPs</b></p> <p>Pytz</p>                                            | $17.5 \times 10^{-6} \text{ M}$ ,<br>$9.4 \times 10^{-6} \text{ M}$ ,<br>$13.2 \times 10^{-6} \text{ M}$ ,<br>$\text{Ni}^{2+}$ , $\text{Ag}^{+}$ ,<br>respectively | aqueous solution                | Sens. Actuators B<br>202 (2014) 23–30     |
| 34. | <p>3 a,b</p> <p>Ar</p> <p>a = </p> <p>b = </p>                                         | $3 \times 10^{-6} \text{ M}$                                                                                                                                       | MeOH                            | Dalton Trans.,<br>2012, 41, 5769–<br>5773 |
| 35. | <p>1a</p> <p>2a-2d</p> <p>2a: L = </p> <p>2b: L = </p> <p>2c: L = </p> <p>2d: L = </p> | $7.33 \times 10^{-4} \text{ M}$                                                                                                                                    | MeOH                            | Inorg. Chem.<br>2009, 48, 549-556.        |
| 36. | <p>1</p>                                                                               | <b>41.5 pM (calc.)</b>                                                                                                                                             | [HEPES (pH 7.4):<br>EtOH = 1:4] | <b>Present work</b>                       |

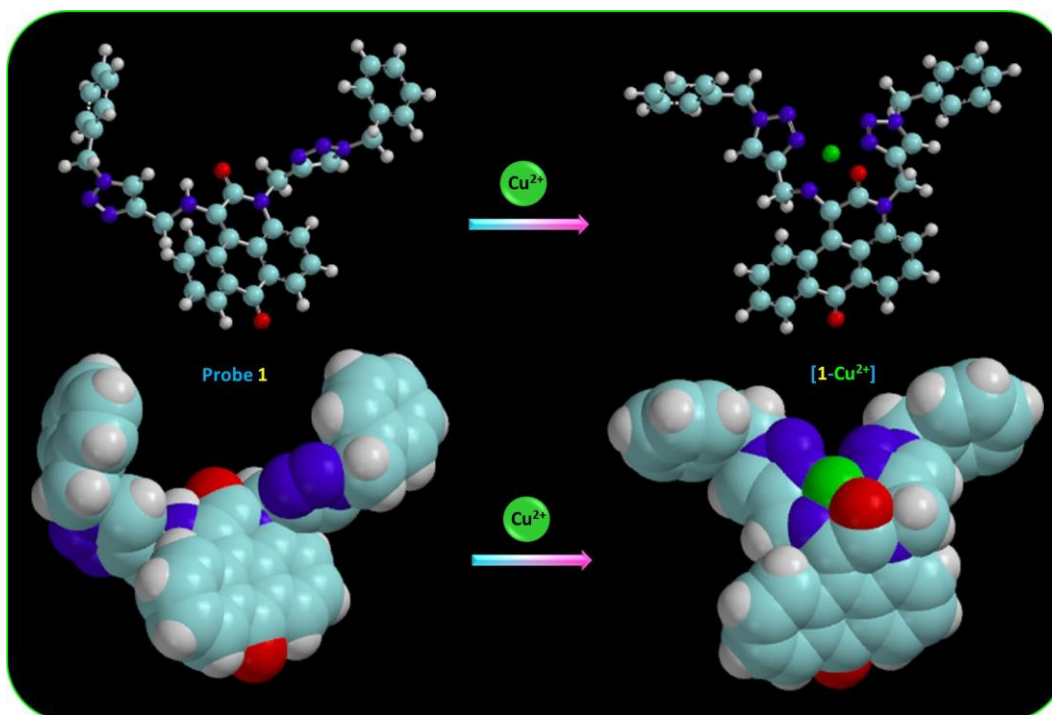

**Figure S5.** Energy-minimized structures of probe **1** and its  $\text{Cu}^{2+}$  complex obtained from DFT calculations at the B3LYP/6-31G\* level. (*Top*) Ball-and-stick model and (*bottom*) space-filling model. Color coding: C = cyan, N = blue, O = red,  $\text{Cu}^{2+}$  = green, and H = white.

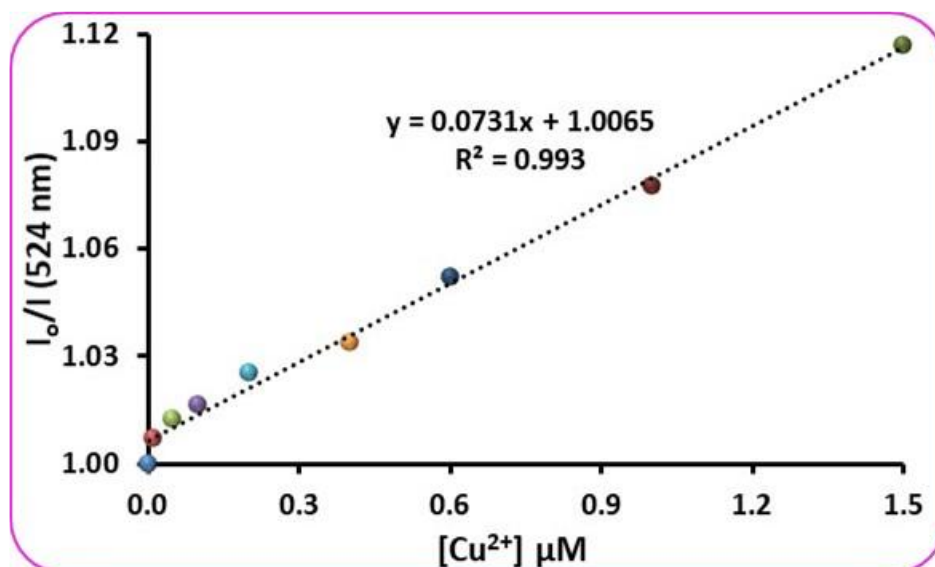

**Figure S6.** Stern-Volmer plot of probe **1** (10  $\mu\text{M}$ , HEPES (pH 7.4): EtOH =1:4) as a function of  $[\text{Cu}^{2+}]$ .  $I_0$  and  $I$  represent fluorescent emission intensities of the probe in the absence and presence of  $\text{Cu}^{2+}$ , respectively.

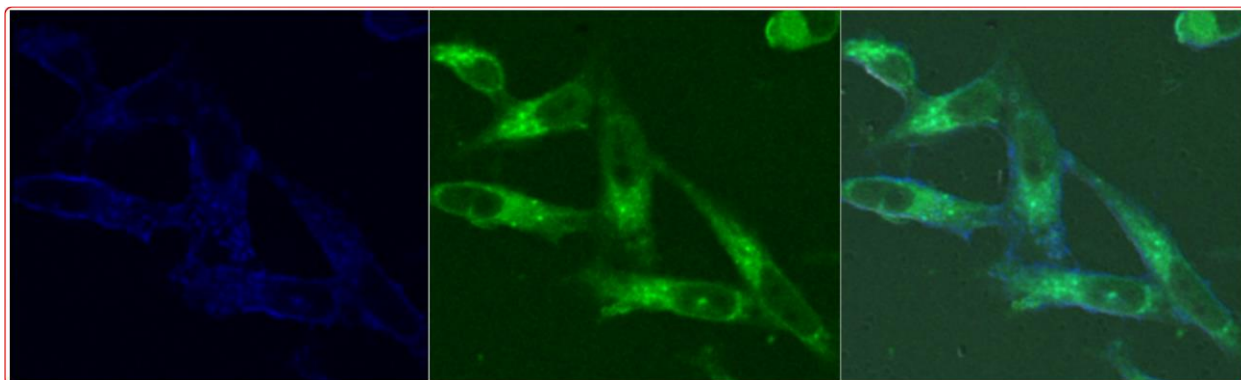

**Figure S7.** Co-localization images of probe **1** in HeLa cells. The cells were incubated with the probe for 30 min. (*left*) Blue channel; (*center*) green channel; (*right*) overlap of two in dark field. The probe is localized within cytoplasm in a high density, while the probe density was very low in the nucleus.

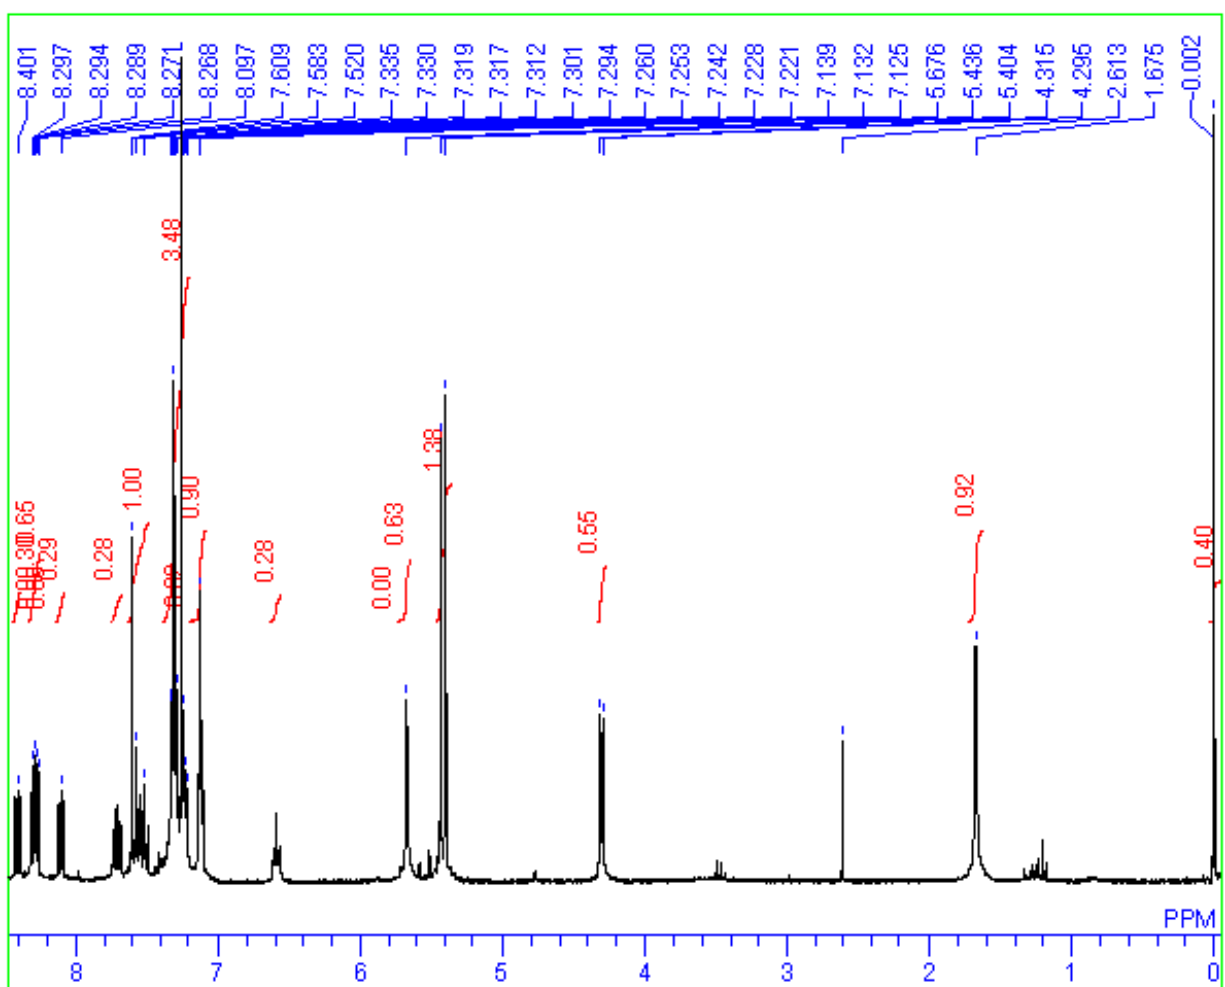

$^1\text{H}$  NMR spectrum of probe **1** in  $\text{CDCl}_3$

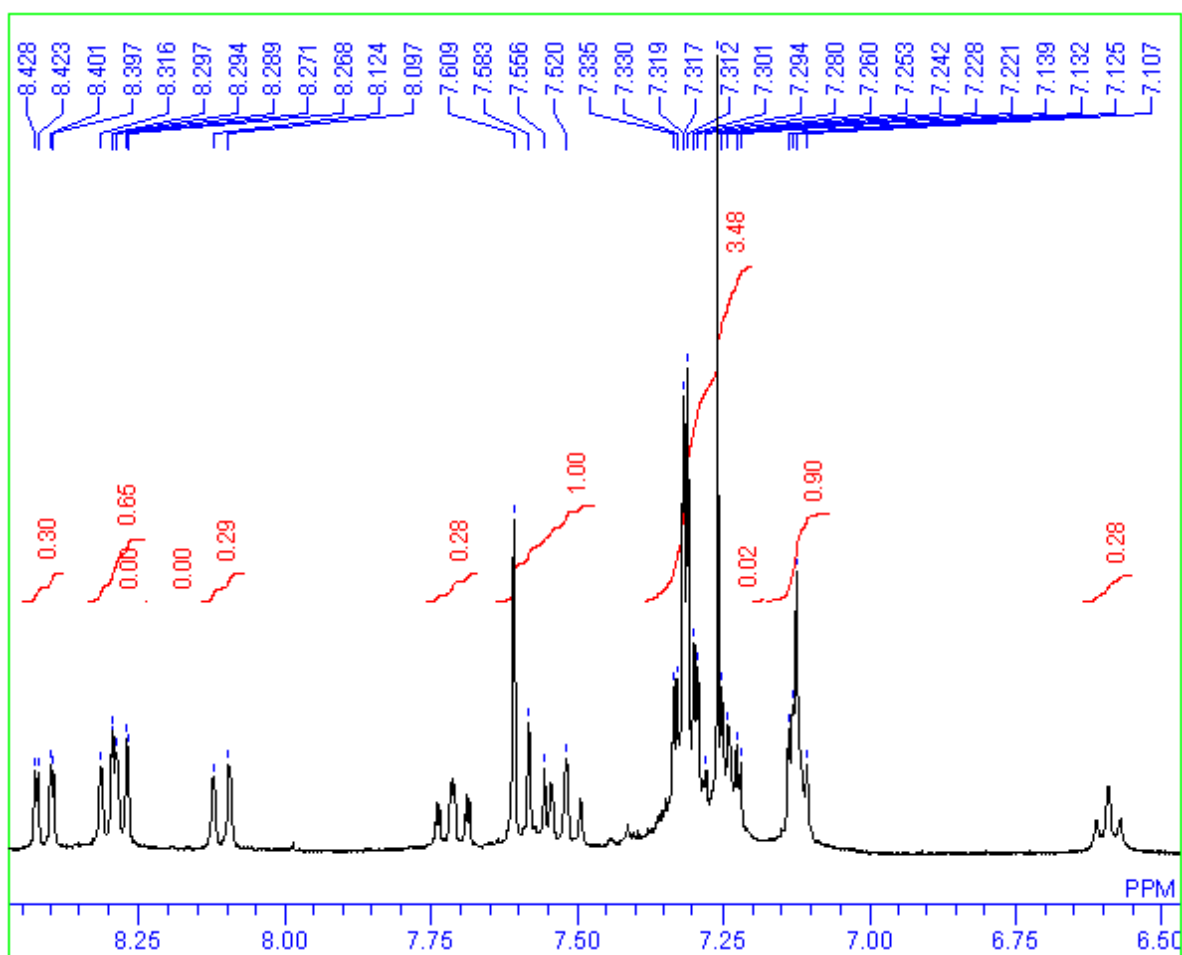

$^1\text{H}$  NMR spectrum of probe **1** (aromatic region) in  $\text{CDCl}_3$

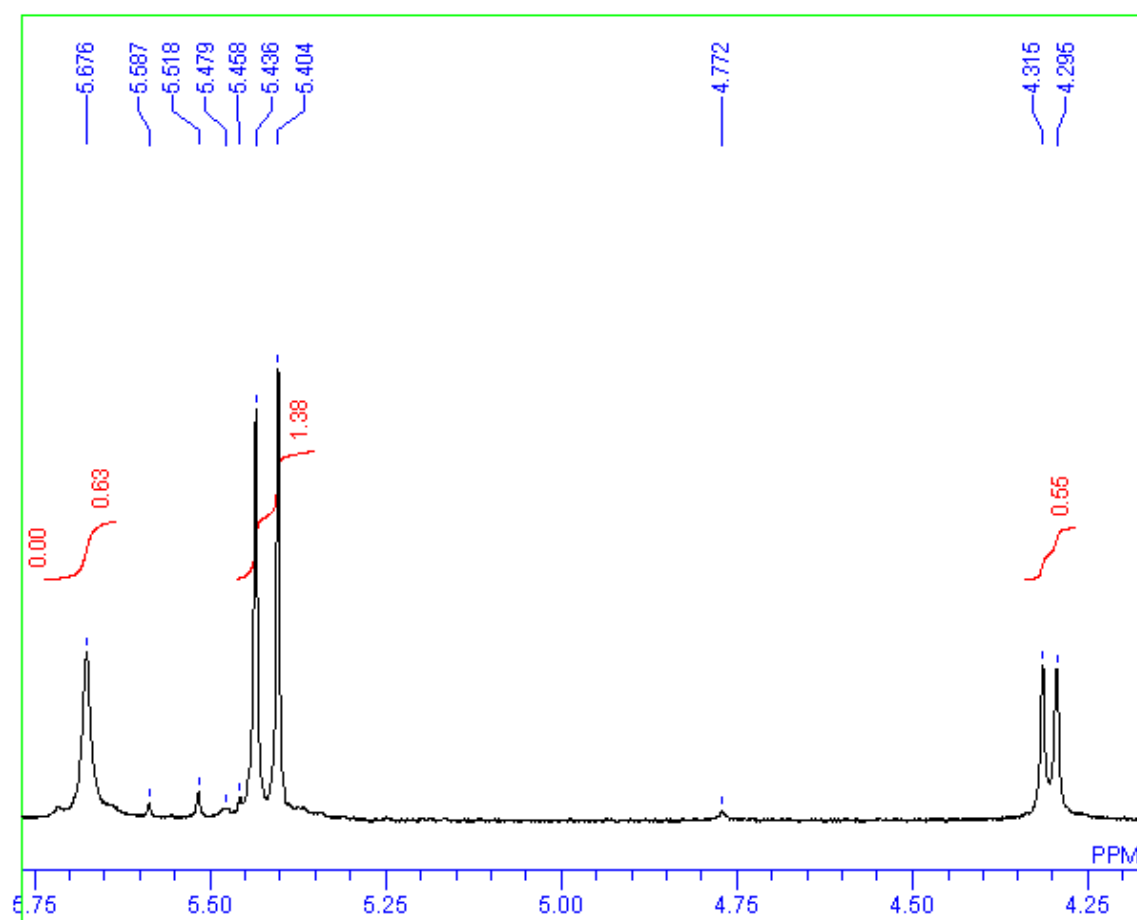

<sup>1</sup>H NMR spectrum of probe **1** (aliphatic region) in CDCl<sub>3</sub>

[Mass Spectrum]  
 Data : DA-49\_1-Bz-DTAF-ANA Date : 13-Jan-2022 13:47  
 Instrument : MSStation  
 Sample : -  
 Inlet : Direct Ion Mode : FAB+  
 Spectrum Type : Normal Ion [EF-Linear]

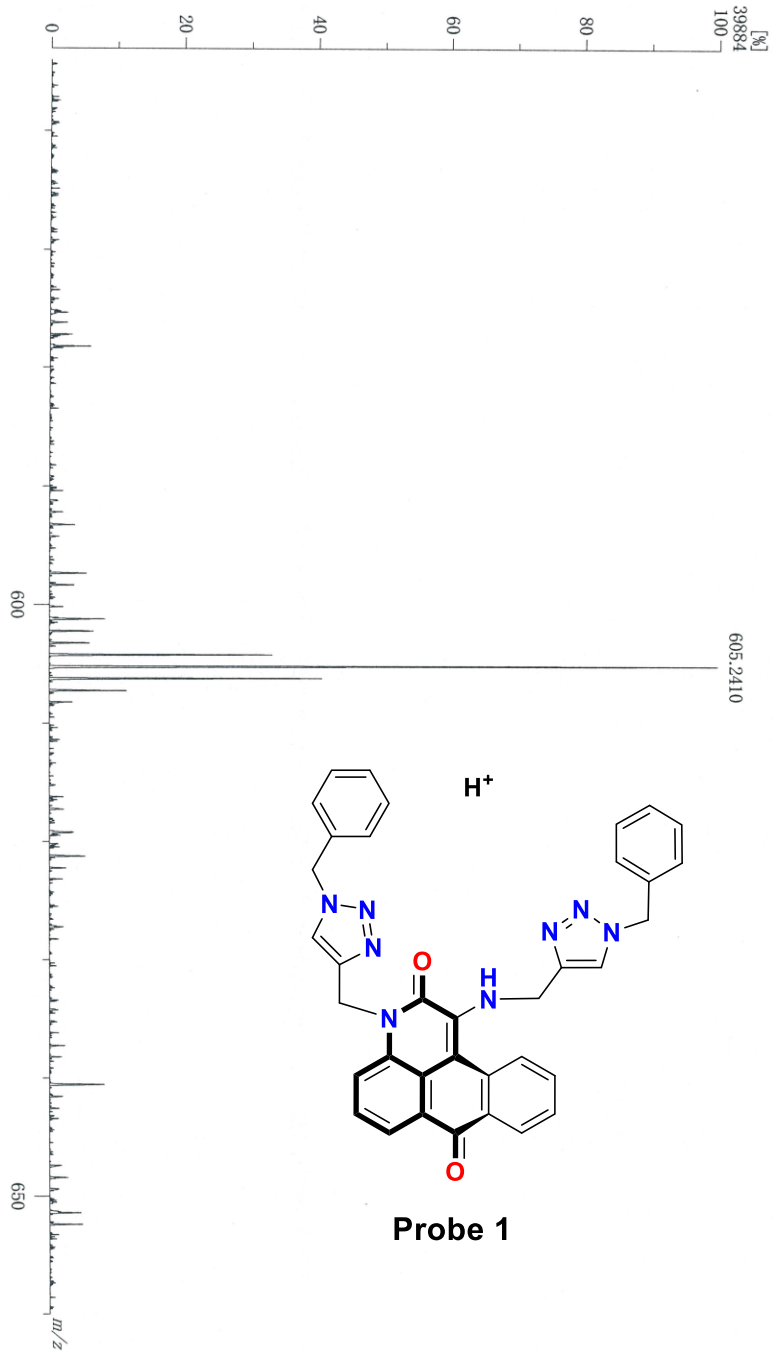

HRMS of probe 1

[Mass Spectrum]  
 Data : DA-49.1-Bz-DTAZ-ANA Date : 13-Jan-2022 13:47  
 Instrument : MStation  
 Sample : -  
 Inlet : Direct Ion Mode : FAB+  
 Spectrum Type : Normal Ion [EF-Linear]

Data : DA-49.1-Bz-DTAZ-ANA Date : 13-Jan-2022 13:47  
 Instrument : MStation  
 Sample : -  
 Note : -  
 Inlet : Direct Ion Mode : FAB+  
 RT : 0.88 min Scan# : 22  
 Elements : C 36/0, H 29/0, N 8/0, O 2/0  
 Mass Tolerance : 3mmu  
 Unsaturation (U.S.) : -0.5 - 100.0

| Observed m/z | Int%   | Err [ppm / mmu] | U.S. Composition   |
|--------------|--------|-----------------|--------------------|
| 1 604.2339   | 33.31  | +0.6 / +0.4     | 27.0 C36 H28 N8 O2 |
| 2 605.2410   | 100.00 | -0.6 / -0.3     | 26.5 C36 H29 N8 O2 |
| 606.2449     | 40.74  |                 |                    |

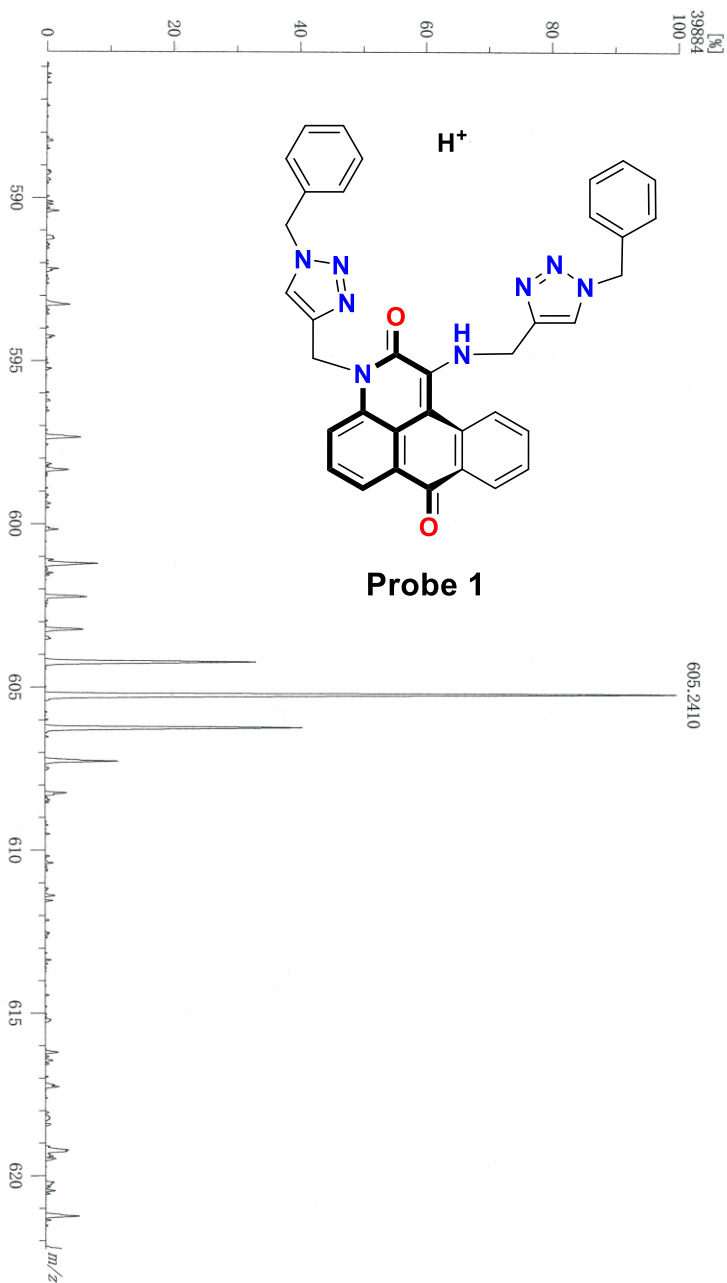

HRMS of probe 1

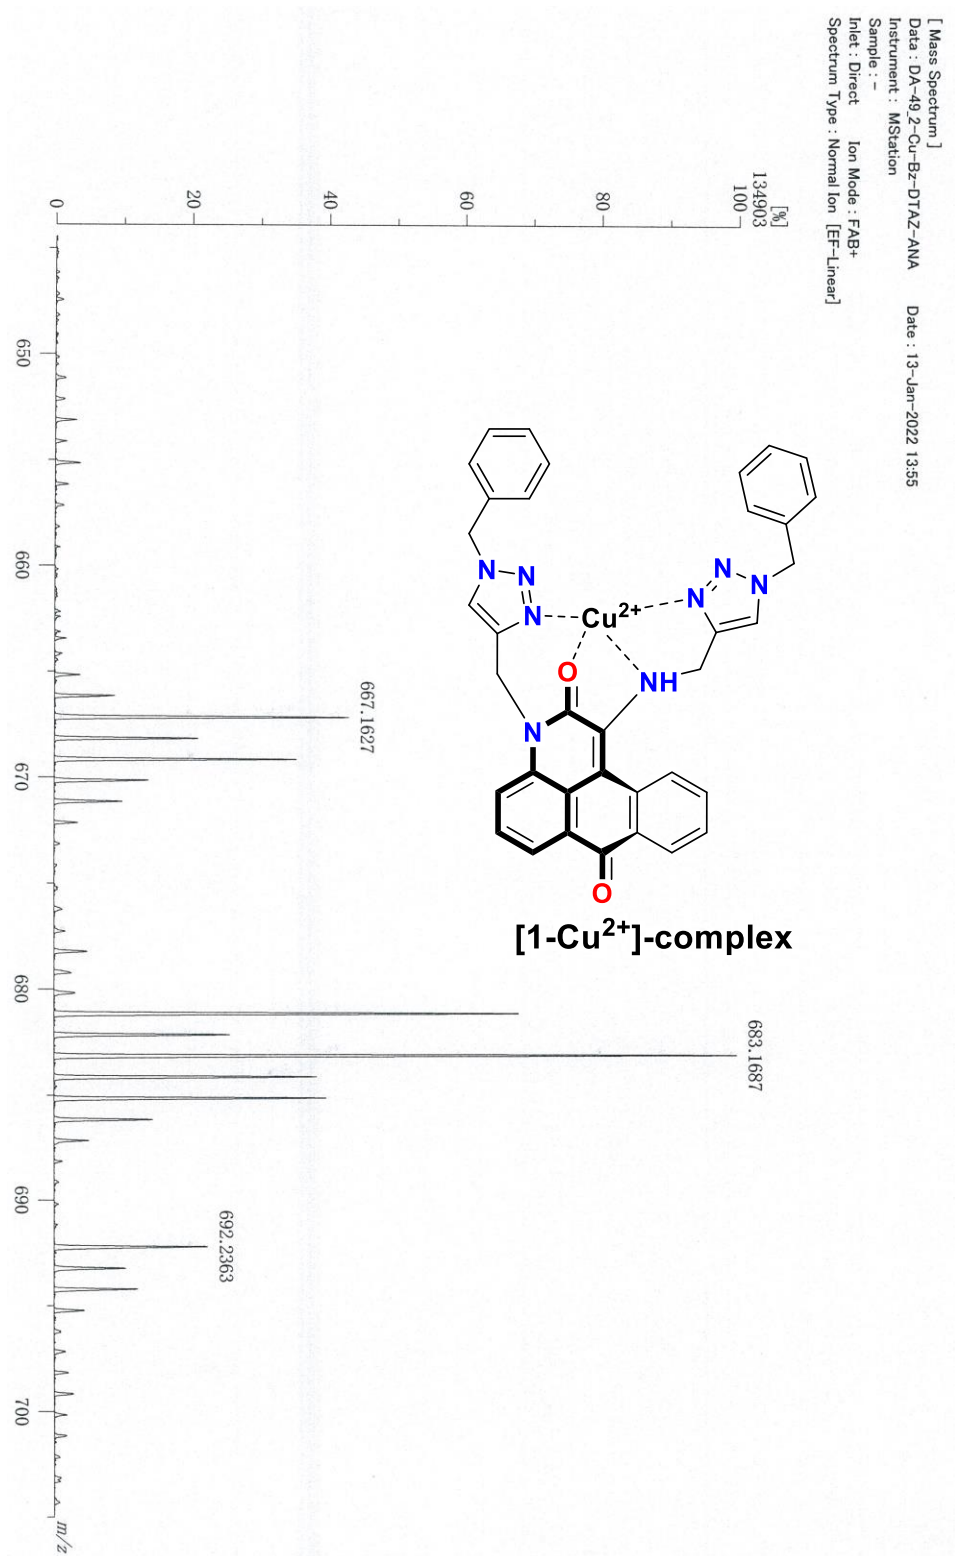

HRMS of **[1-Cu<sup>2+</sup>]-complex**

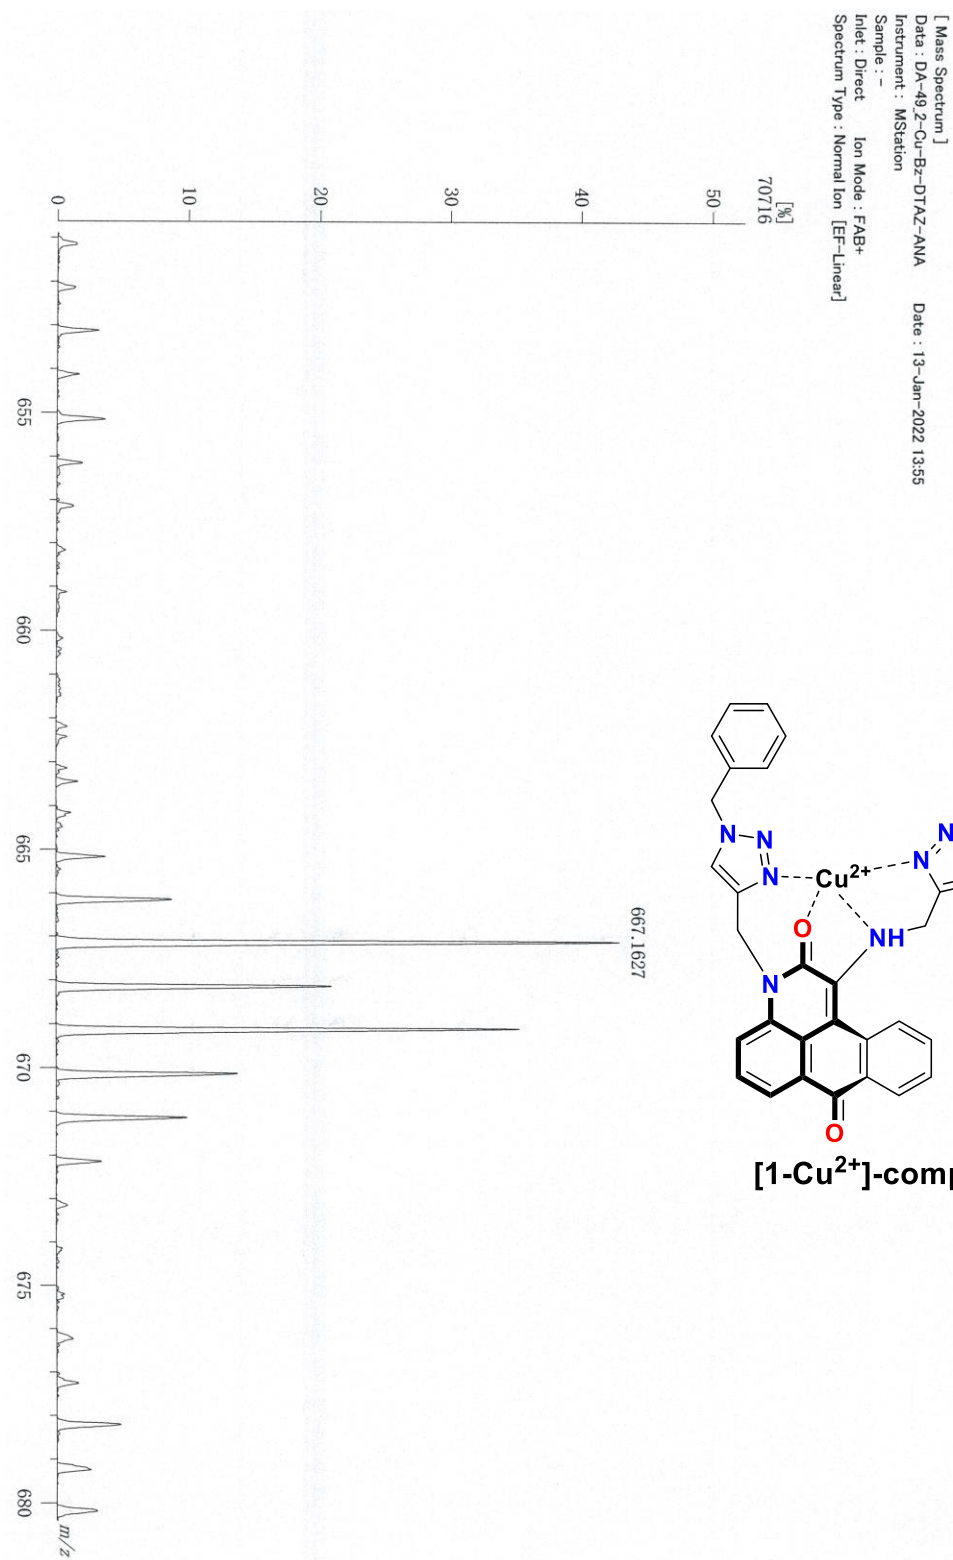

HRMS of **[1-Cu<sup>2+</sup>]-complex**
